# Supplementary material for: An Evolutionary Perspective on the Genetics of Anorexia Nervosa
Source: bioRxiv or medRxiv preprint supplement (doi:10.1101/2023.08.09.23293879), 2024-04-09

**Supplementary Figure 1: Functional annotation of SNPs (A) shared between AN and BMI and; (B) shared between AN and age at menarche**

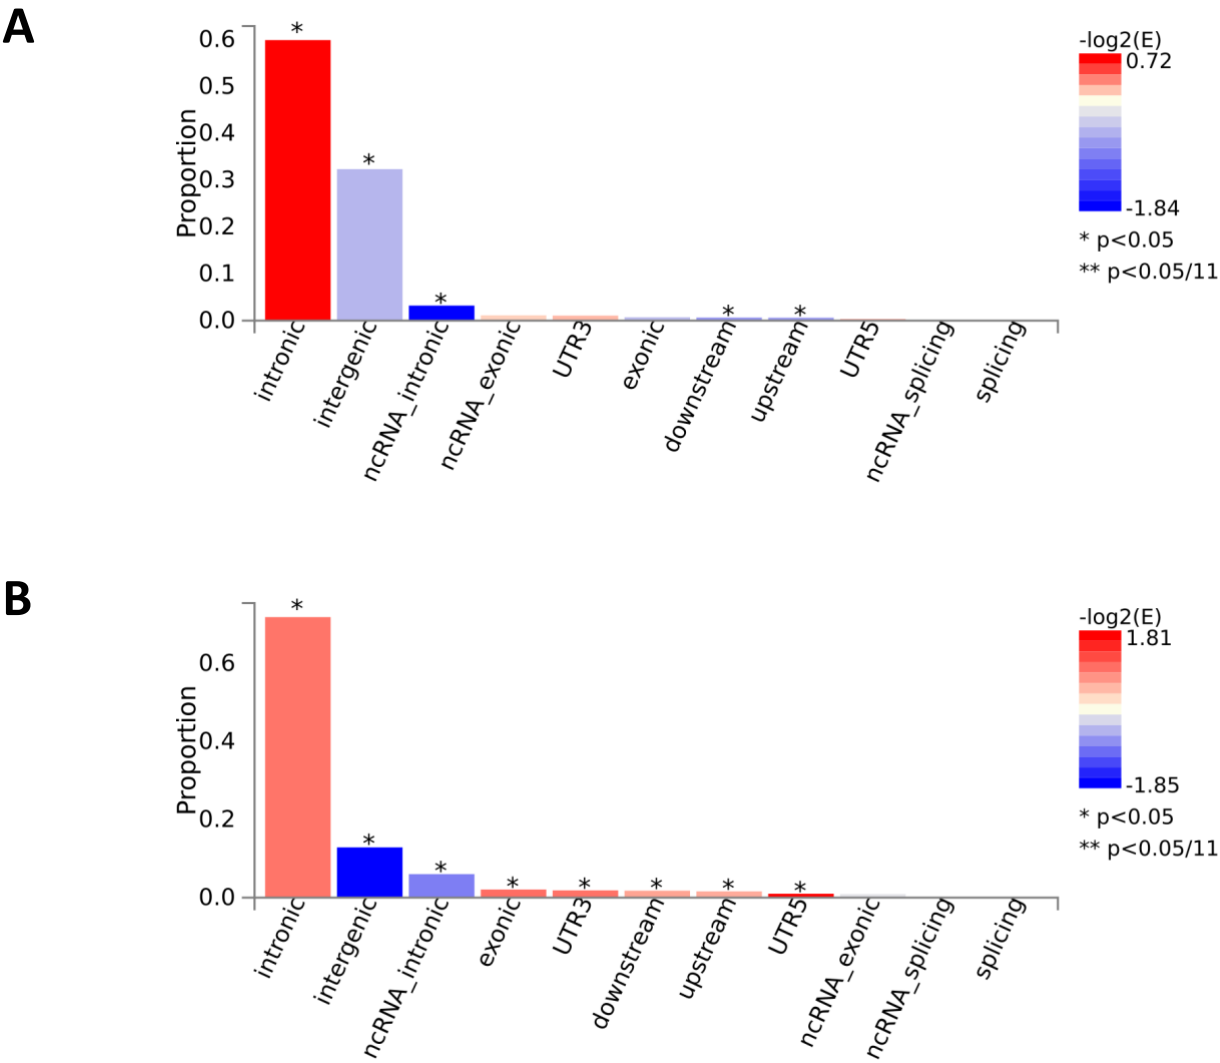

**Supplementary Figure 2: Expression of mapped genes shared between AN and BMI based on 54 tissue types**

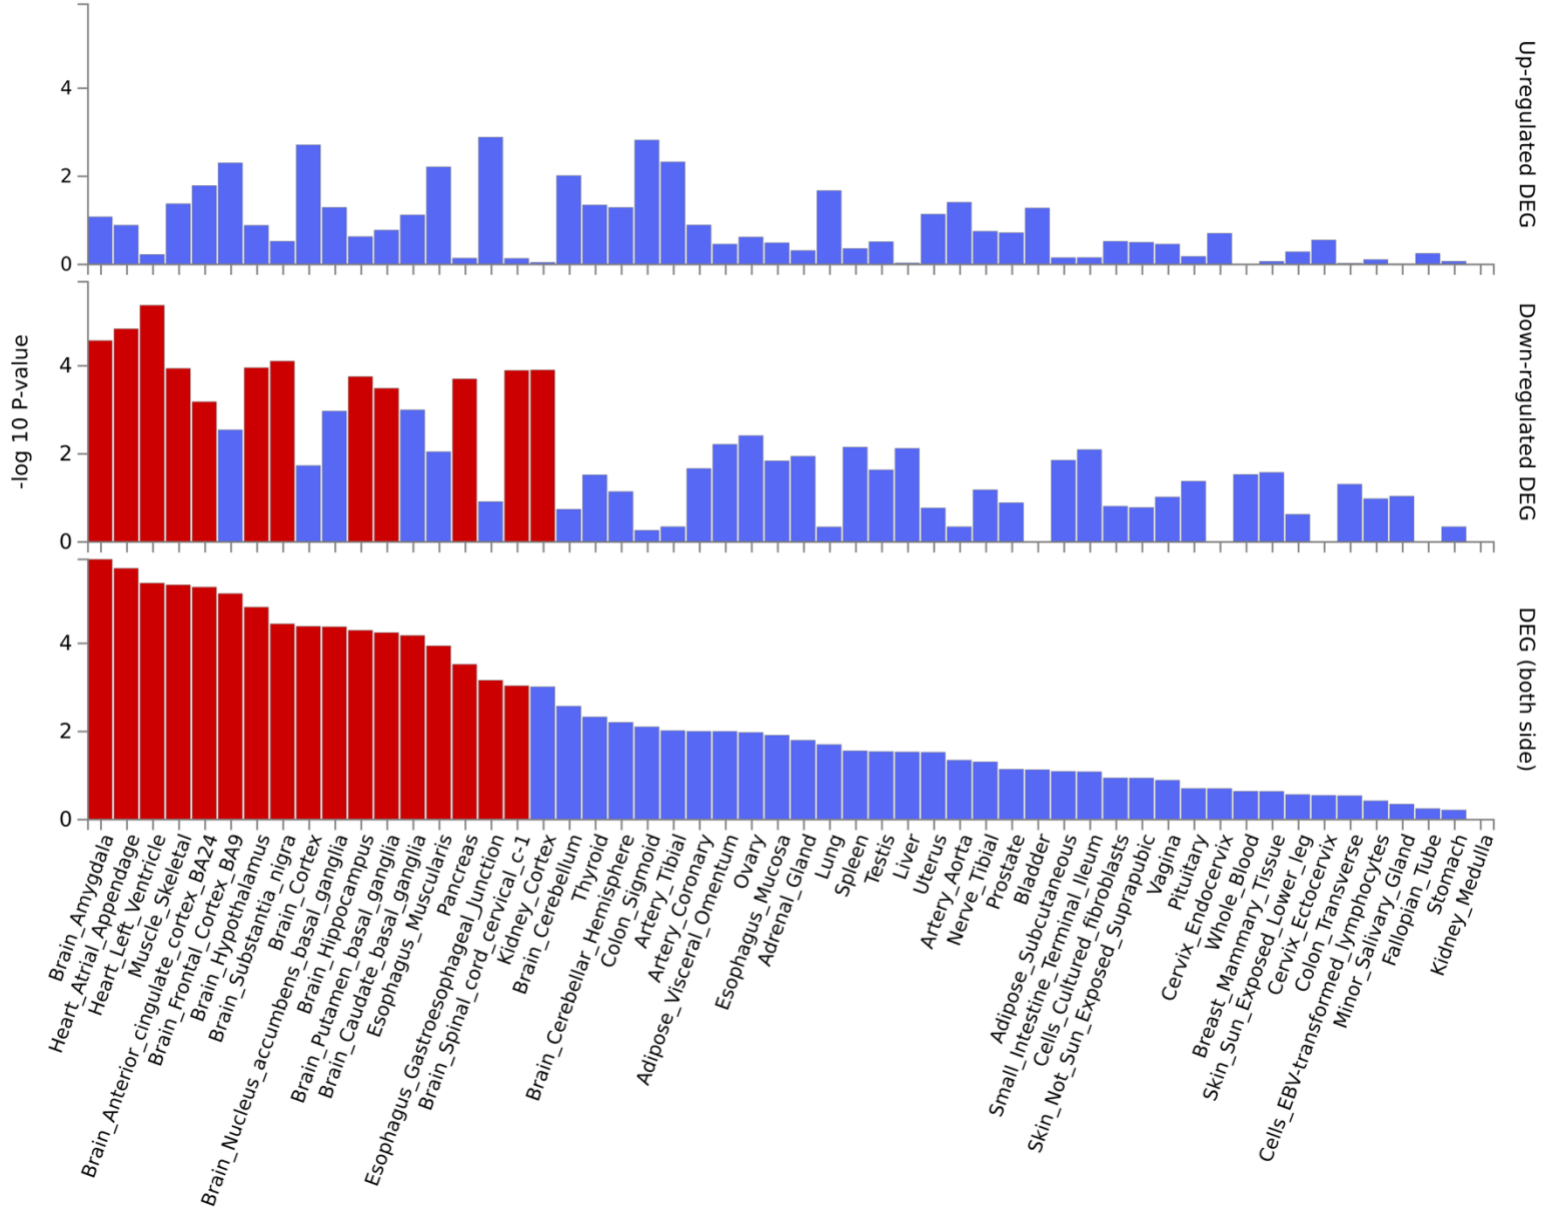

**Supplementary Figure 3: Expression of mapped genes shared between AN and age at menarche based on 54 tissue types**

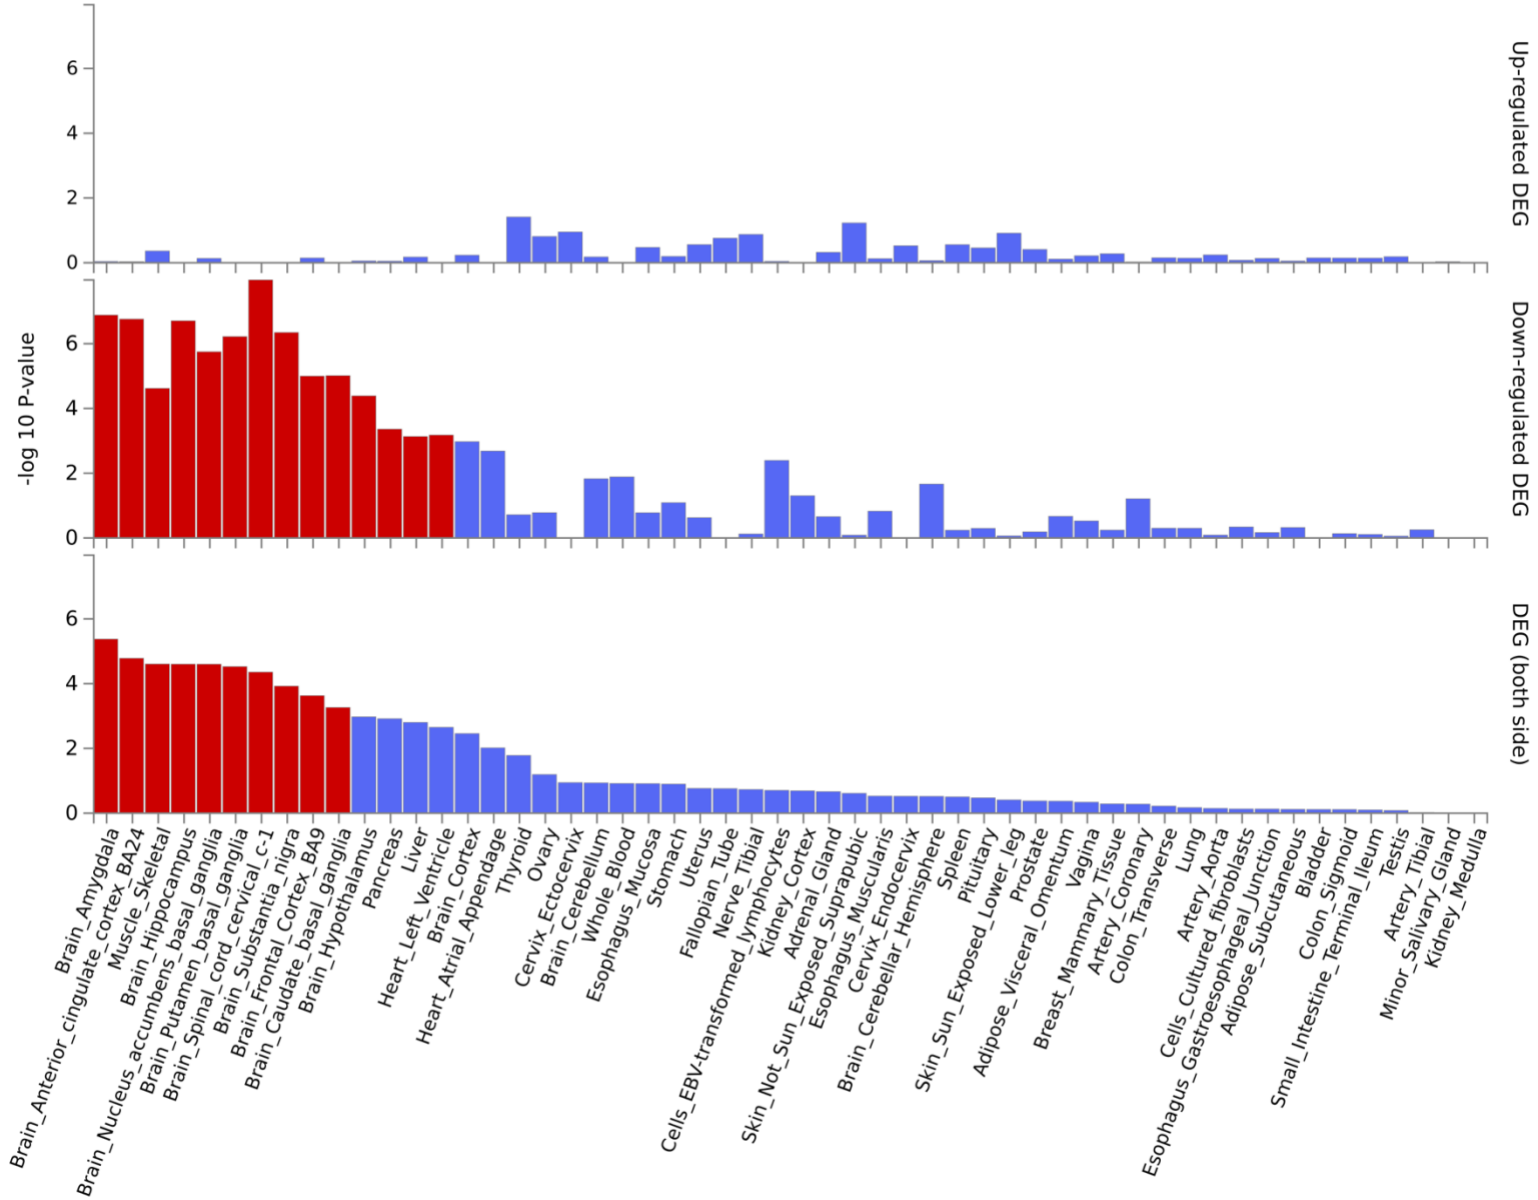

**Supplementary Figure 4: GO biological processes identified with FUMA for the genes shared between AN and BMI**

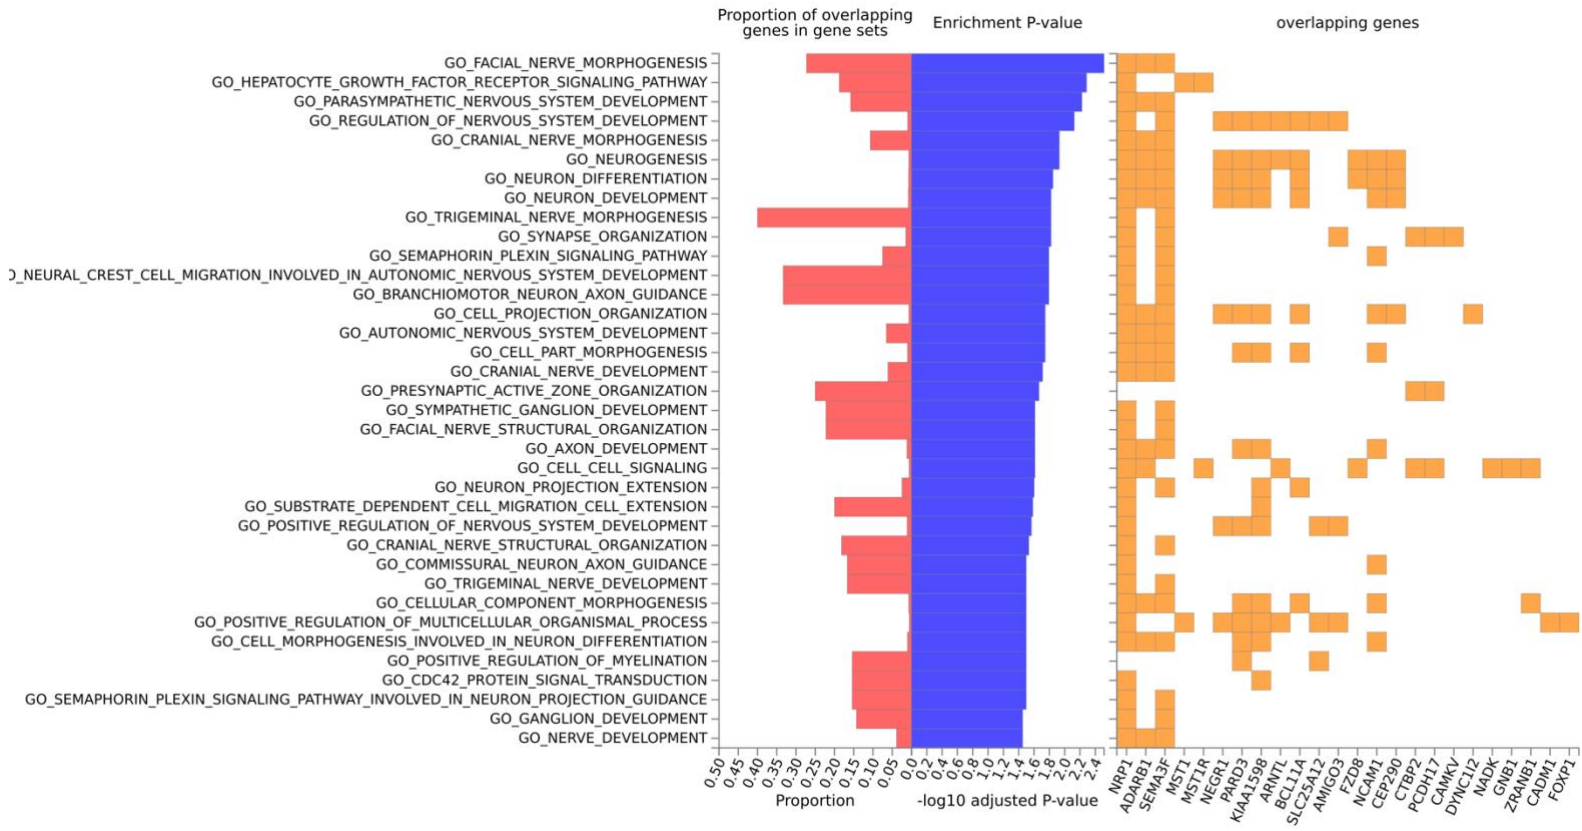

**Supplementary Figure 5: GO biological processes identified with FUMA for the genes shared between AN and age at menarche**

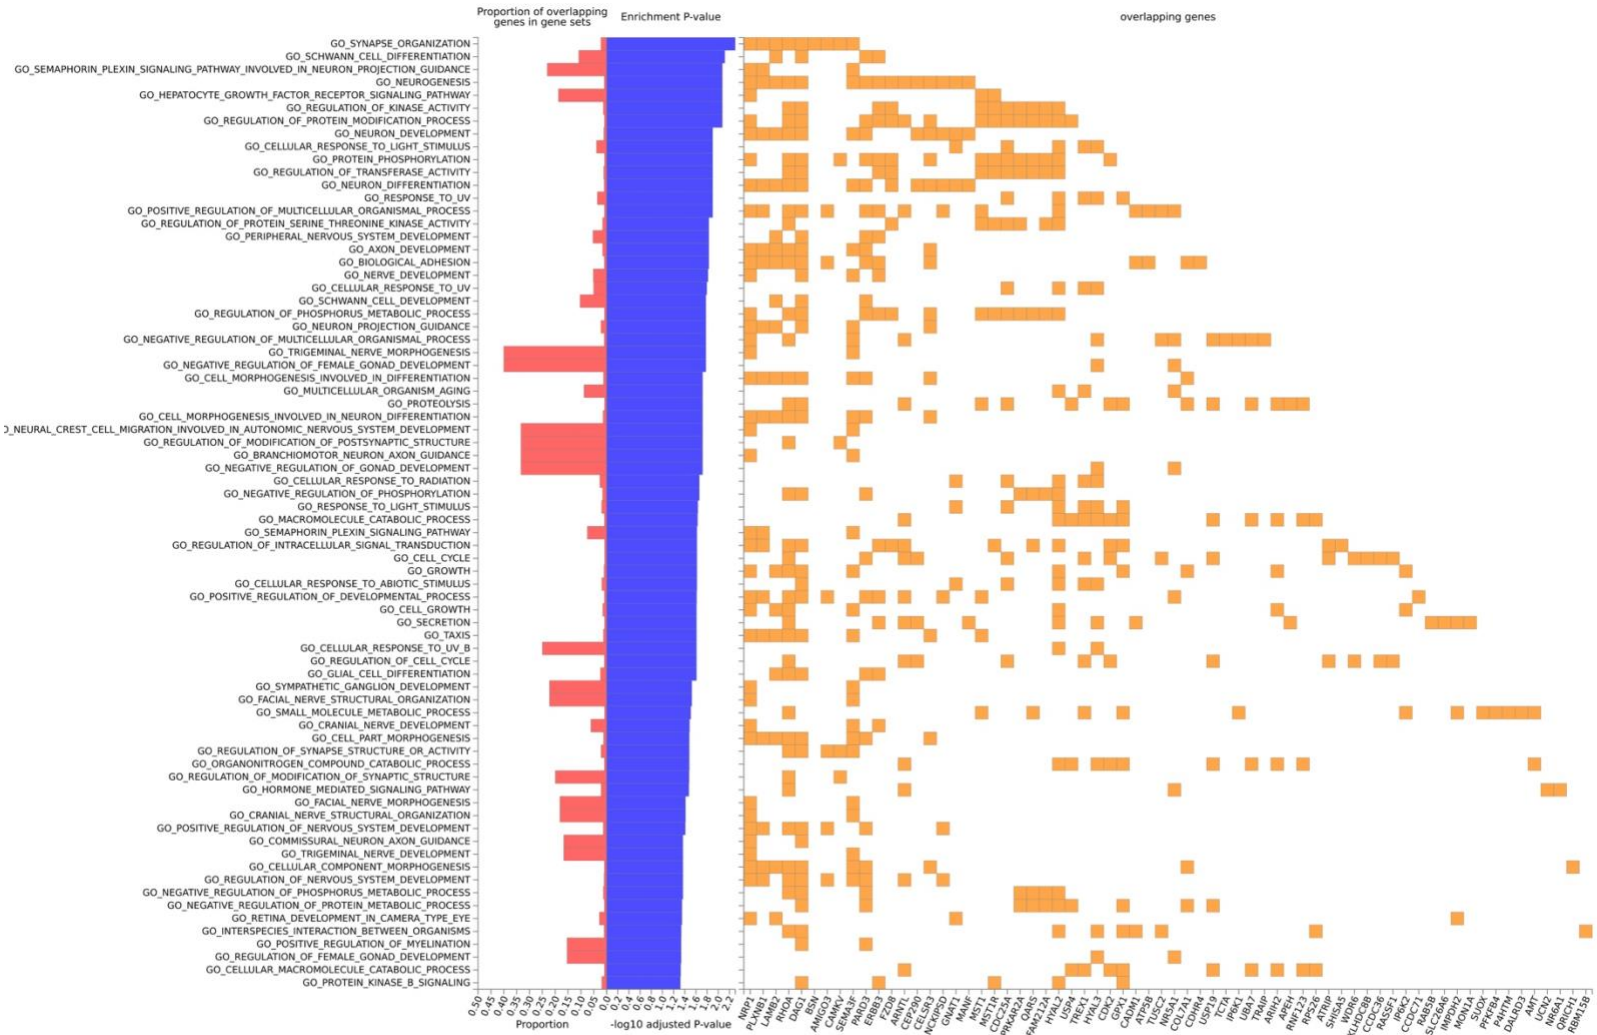

Supplementary Figure 6: GWAS phenotypes identified with FUMA for the genes shared between AN and BMI

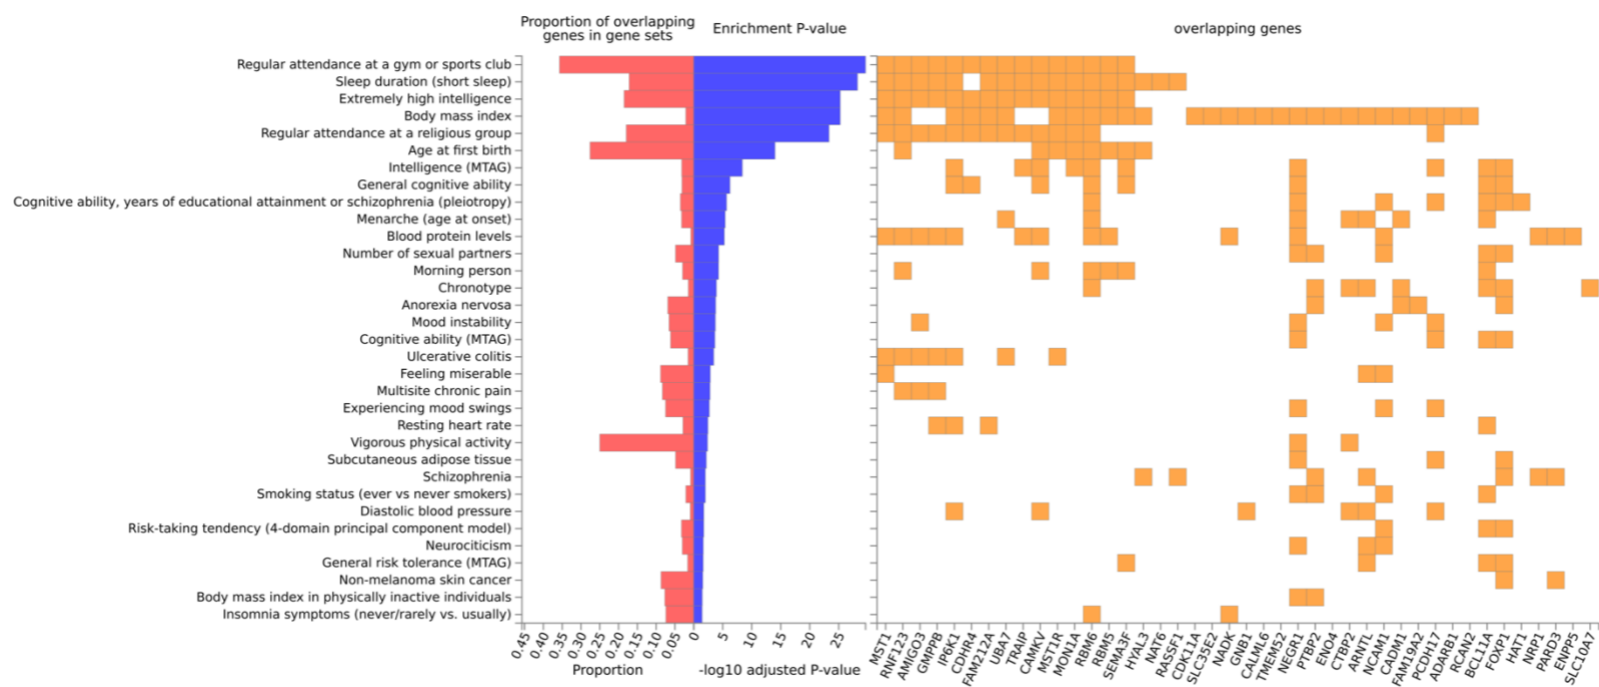

**Supplementary Figure 7: GWAS phenotypes identified with FUMA for the genes shared between AN and age at menarche**

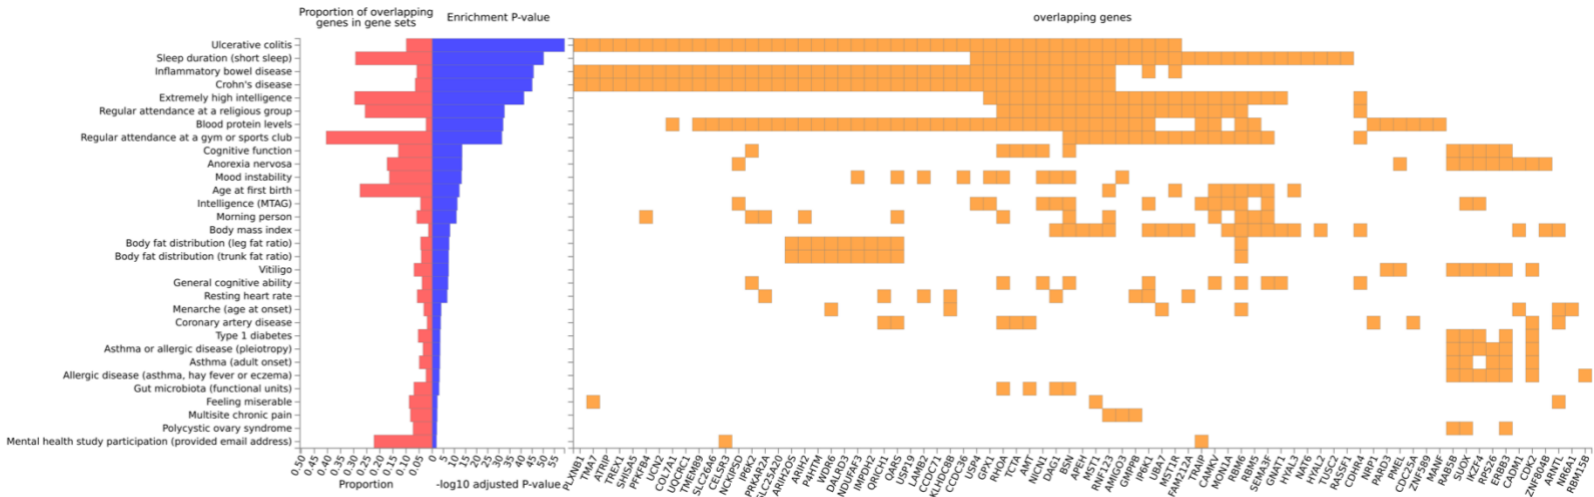

Supplement: Supplementary file [file media-1.pdf]
